# Supplementary material for: New family of room temperature quantum spin Hall insulators in two-dimensional germanene films
Source: Royal Society of Chemistry journal article supplement (doi:10.1039/c6tc00160b), 2016-01-01
Supplement: c6tc00160b1.pdf [file c6tc00160b1.pdf]

## **Supplementary Information for:**

### **New Family of Room Temperature Quantum Spin Hall Insulators in Two-Dimensional Germanene films**

Run-wu Zhang,<sup>a</sup> Chang-wen Zhang\*,<sup>a</sup> Wei-xiao Ji,<sup>a</sup> Sheng-shi Li,<sup>b</sup> Ping Li,<sup>a</sup> and Pei-ji Wang <sup>a</sup>

<sup>a</sup>School of Physics and Technology, University of Jinan, Jinan, Shandong, 250022, People's  
Republic of China

<sup>b</sup>School of Physics, State Key laboratory of Crystal Materials, Shandong University, Jinan,  
Shandong, 250100, People's Republic of China

\* Correspondence and requests for materials should be addressed to: [zhchwsd@163.com](mailto:zhchwsd@163.com)

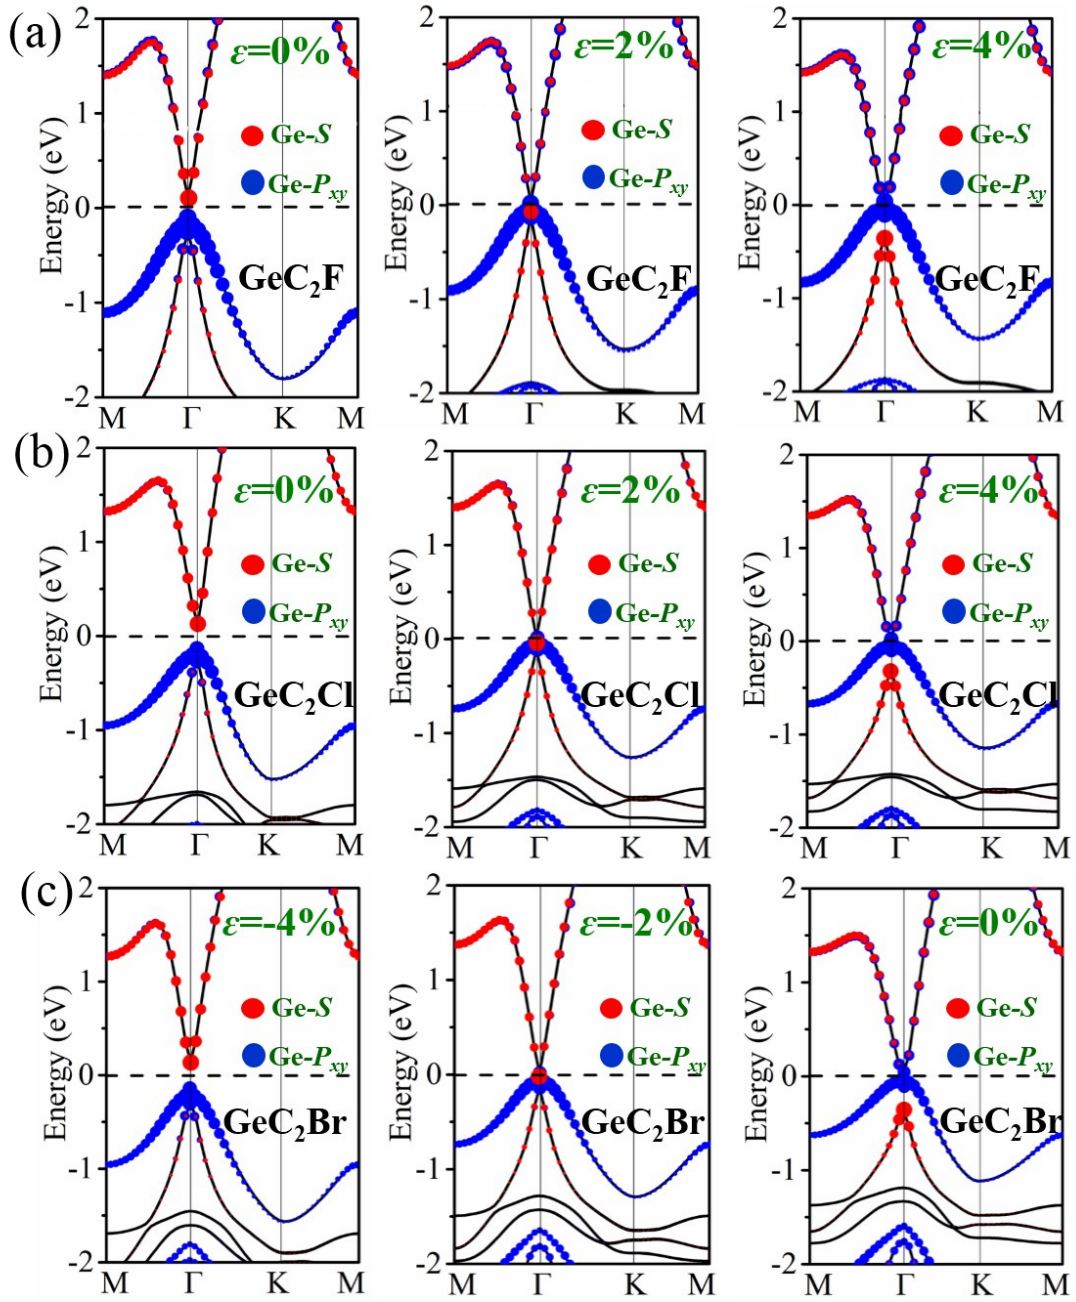

**Fig. S1.** Orbital-resolved band structures with SOC of (a)  $\text{GeC}_2\text{F}$  and (b)  $\text{GeC}_2\text{Cl}$  under the value of strain  $\varepsilon = 0.0\%$ ,  $2.0\%$ ,  $4.0\%$  respectively. (c)  $\text{GeC}_2\text{Br}$  presents orbital-resolved band structures with SOC under the value of strain  $\varepsilon = -4.0\%$ ,  $-2.0\%$ ,  $0.0\%$  respectively. The red dots represent the contributions from the  $s$  atomic orbital of Ge atom and the blue dots represent contributions from the  $p_x$  and  $p_y$  atomic orbitals of Ge atom.

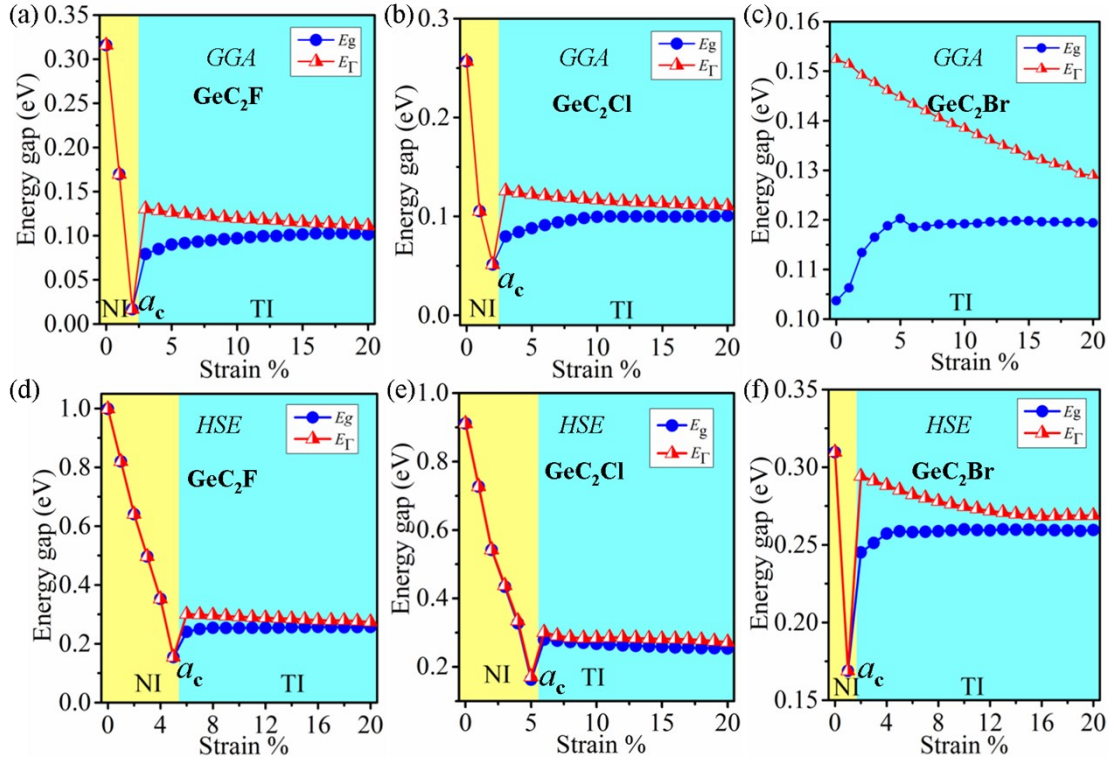

**Fig. S2** The calculated energy gaps at  $\Gamma$  point ( $E_{\Gamma}$ ) and the global energy gap ( $E_g$ ) of  $\text{GeC}_2\text{F}$  (a),  $\text{GeC}_2\text{Cl}$  (b) and  $\text{GeC}_2\text{Br}$  (c) with SOC as a function of external strain by GGA method. The energy gaps at  $\Gamma$  point ( $E_{\Gamma}$ ) and the global energy gap ( $E_g$ ) of  $\text{GeC}_2\text{F}$  (d),  $\text{GeC}_2\text{Cl}$  (e) and  $\text{GeC}_2\text{Br}$  (f) with SOC as a function of external strain by HSE method. Insets in panel show the trend of band gaps of TI phase as a function of external strain.

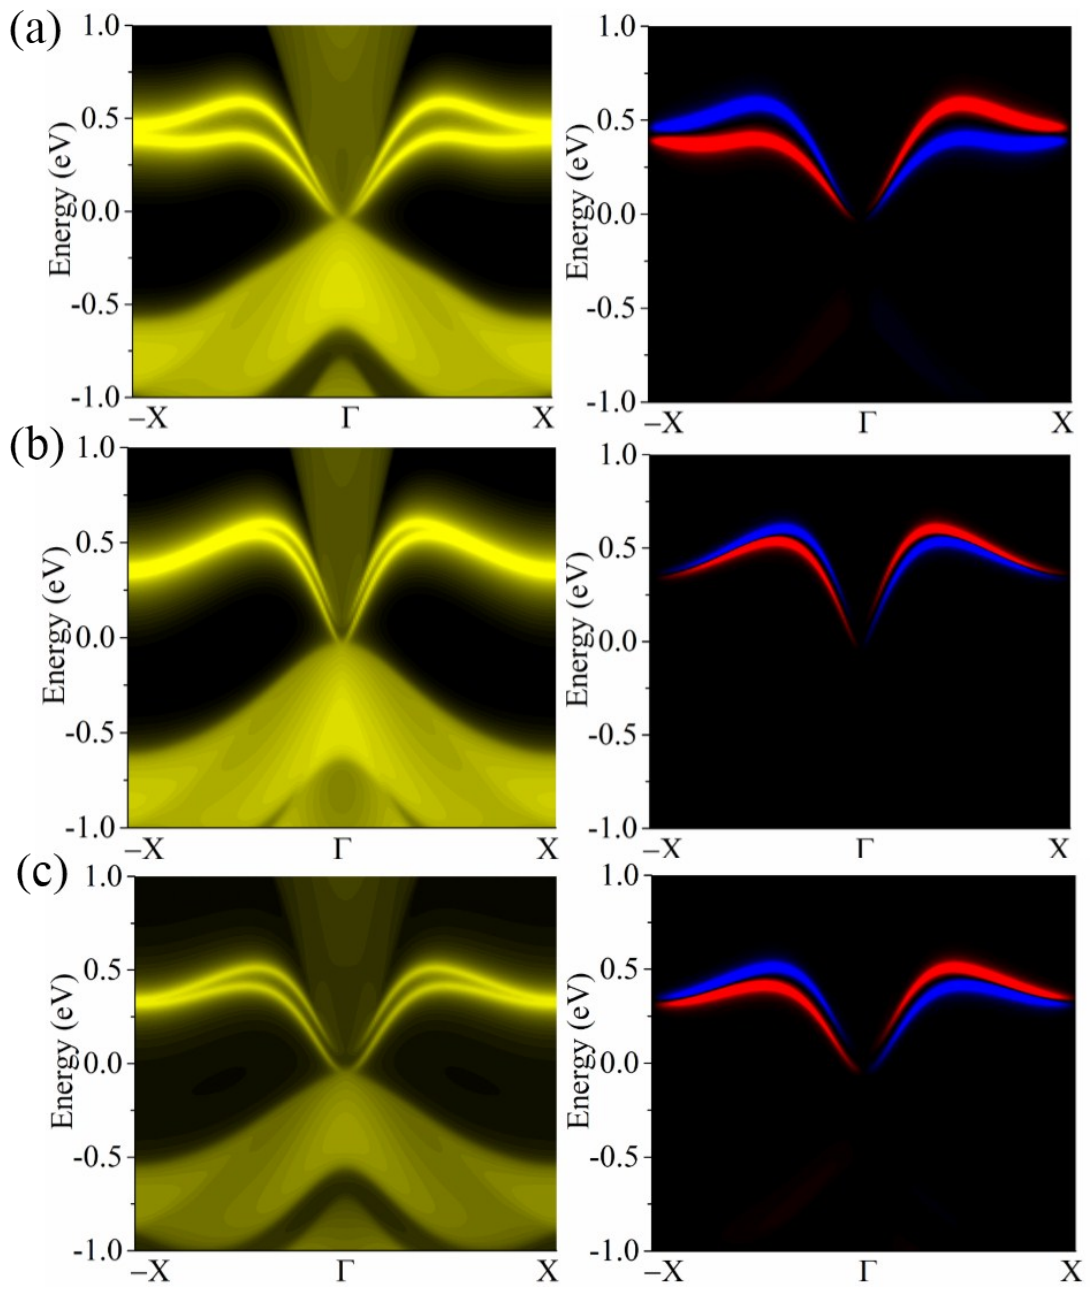

**Fig. S3** Total (left panel) and spin (right panel) edge density of states for (a)  $\text{GeC}_2\text{F}$ , (b)  $\text{GeC}_2\text{Cl}$  and (c)  $\text{GeC}_2\text{Br}$ . In the spin edge plot, red/blue lines denote the spin up/down polarization.

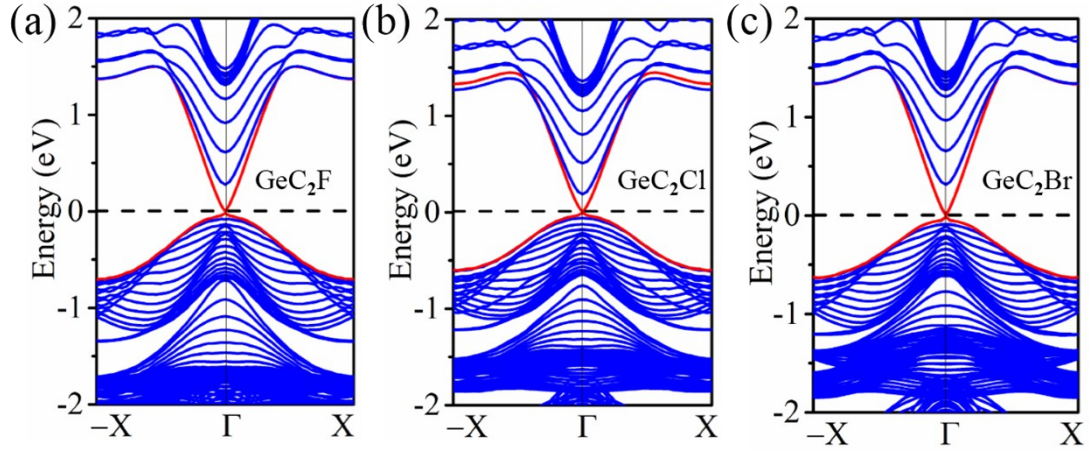

**Fig. S4** Calculated electronic band structures of the zigzag-type nanoribbons of (a)  $\text{GeC}_2\text{F}$  ( $\epsilon = 8.0\%$ ); (b)  $\text{GeC}_2\text{Cl}$  ( $\epsilon = 8.0\%$ ); and (d)  $\text{GeC}_2\text{Br}$  ( $\epsilon = 0\%$ ) with SOC.

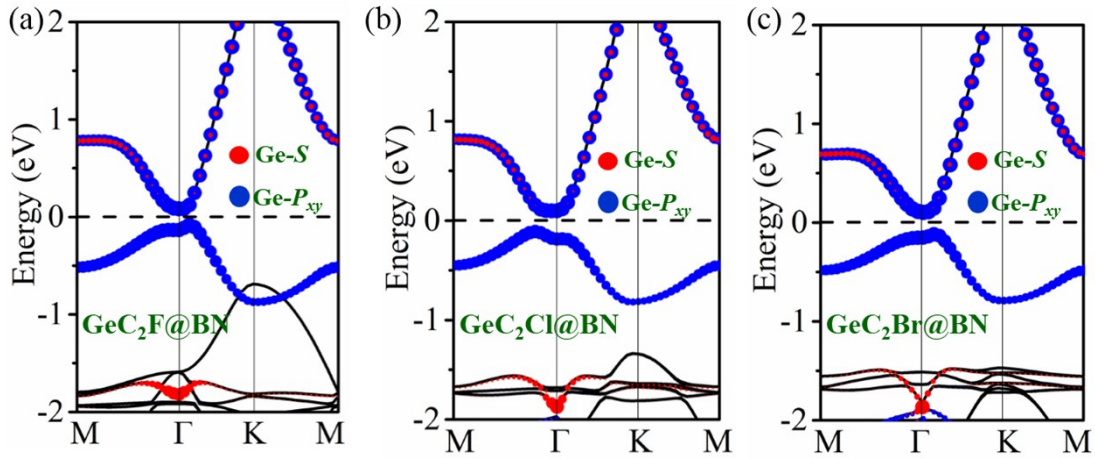

**Fig. S5** The orbital-resolved band structures with SOC for (a)  $\text{GeC}_2\text{F@BN}$ , (b)  $\text{GeC}_2\text{Cl@BN}$  and (c)  $\text{GeC}_2\text{I@BN}$ , respectively.
